# Supplementary material for: Fabrication and Application of SERS-Active Cellulose Fibers Regenerated from Waste Resource
Source: MDPI journal article supplement (doi:10.3390/polym13132142), 2021-06-29
Supplement: s1 [file s1]

# **Fabrication and application of SERS-active cellulose fibers regenerated from waste resource**

Shengjun Wang<sup>a</sup>, Jiaqi Guo<sup>b</sup>, Alan X. Wang<sup>c</sup>, Yibo Ma<sup>d</sup>, Xianming Kong<sup>a\*</sup>, Qian Yu<sup>a\*</sup>

<sup>a</sup> School of Petrochemical Engineering, Liaoning Petrochemical University, Fushun, Liaoning 113001, P. R. China

<sup>b</sup> Jiangsu Co-Innovation Center for Efficient Processing and Utilization of Forest Resources and Joint International Research Lab of Lignocellulosic Functional Materials, Nanjing Forestry University, Nanjing 210037, P. R. China

<sup>c</sup> School of Electrical Engineering and Computer Science, Oregon State University, Corvallis, OR 97331, USA

<sup>d</sup> Department of Bioproducts and Biosystems, School of Chemical Engineering, Aalto University, FI-00076 Aalto, Finland

\*Corresponding author: xmkong@lnpu.edu; [qyu@lnpu.edu.cn](mailto:qyu@lnpu.edu.cn)

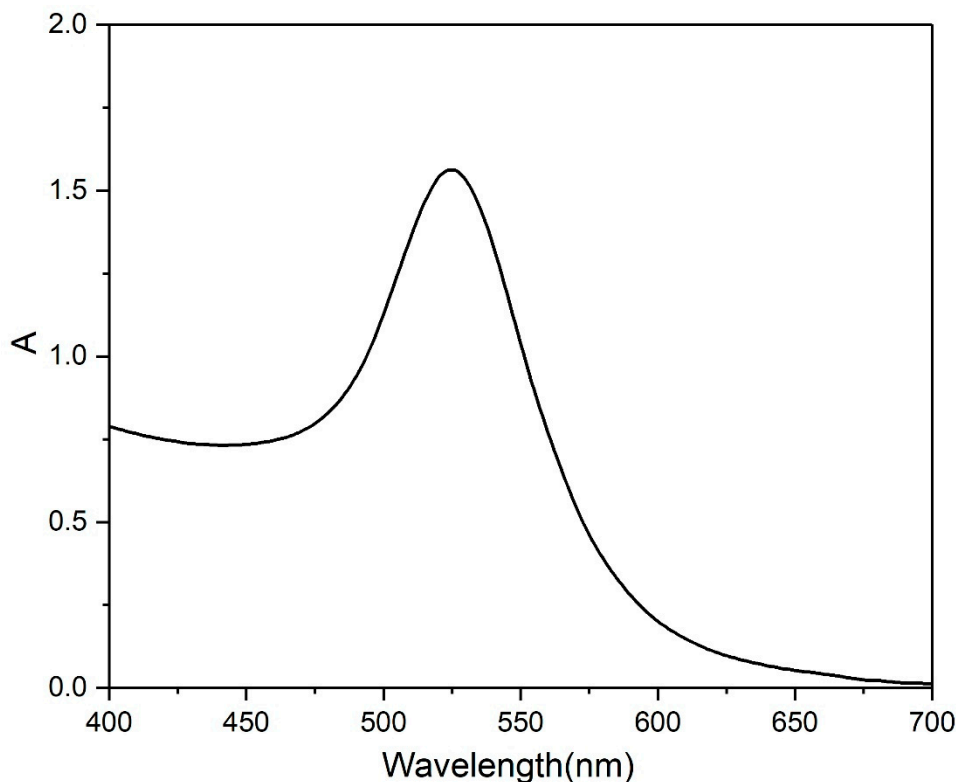

**Figure S1.** UV-Vis spectra of colloidal gold nanoparticles

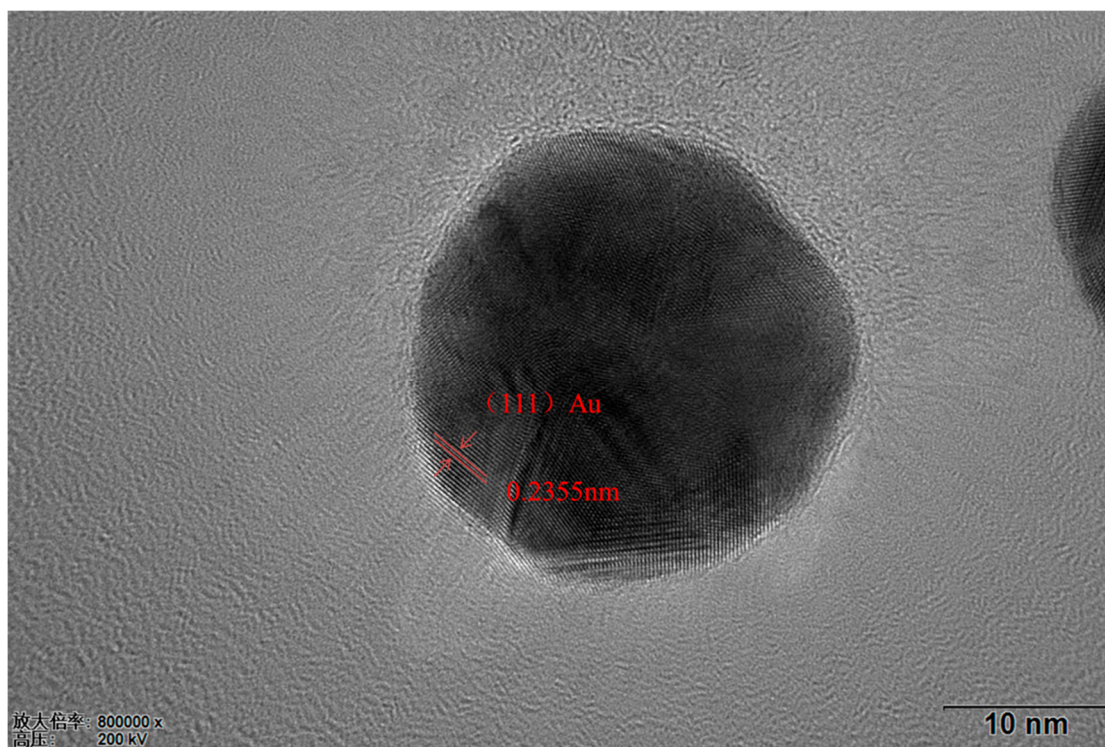

**Figure S2.** HRTEM image of Au NP

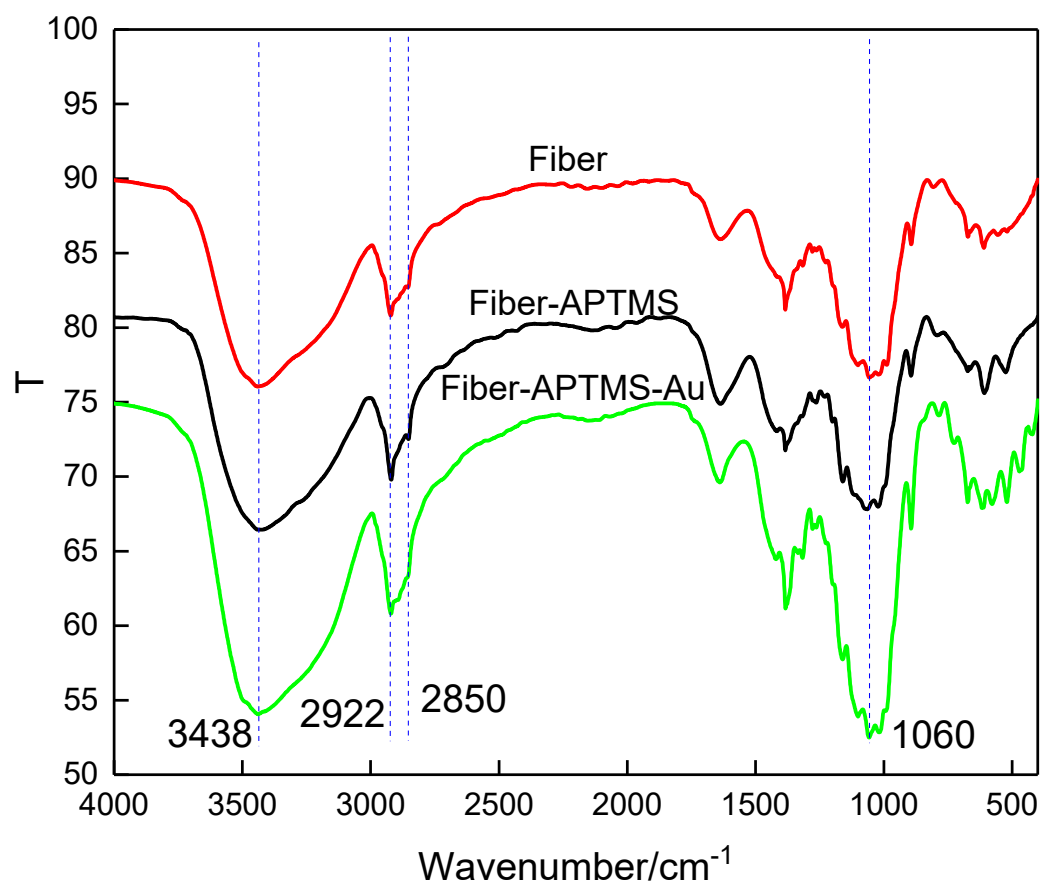

**Figure S3.** FTIR spectra of regenerated cellulose fiber and after modification

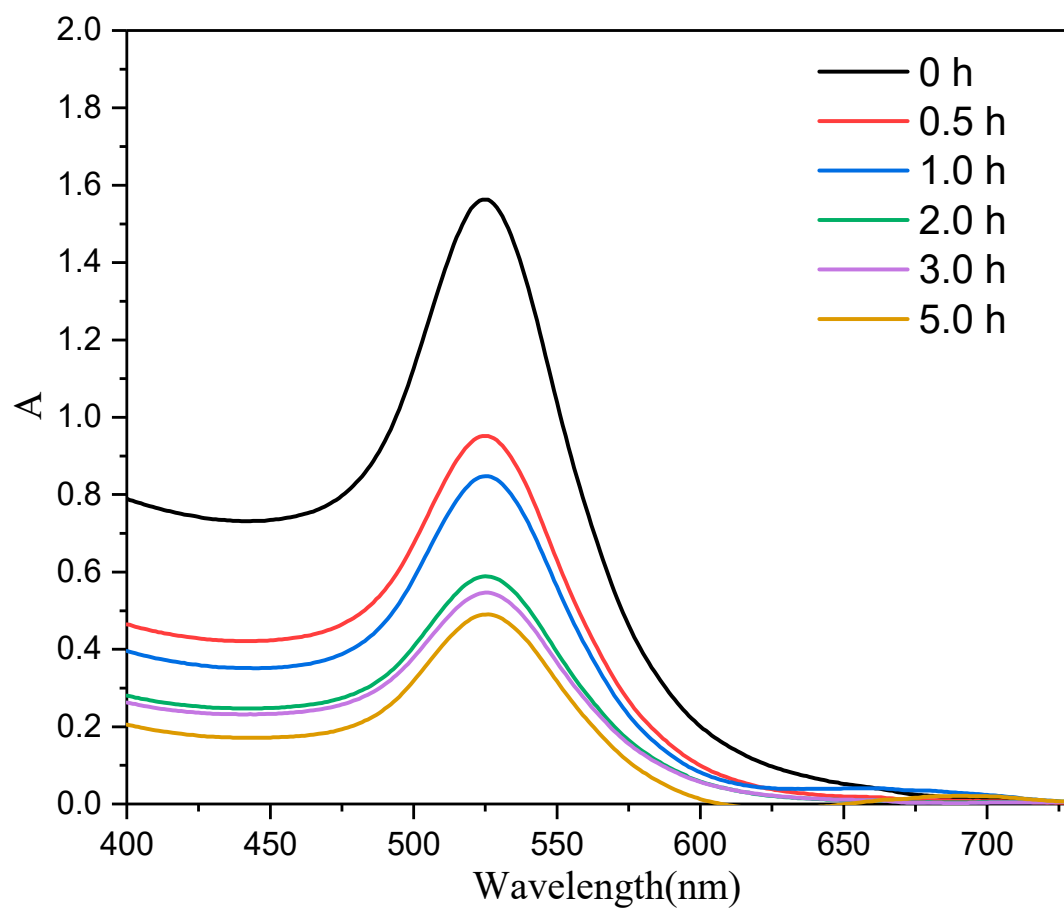

**Figure S4.** The UV-vis spectra of Au colloid after exposure cellulose fibers with different assemble times.
